# Supplementary material
Source: PubMed Central journal article supplement (PMC5414311)
Supplement: NIHMS859562-supplement-1.pdf [file NIHMS859562-supplement-1.pdf]

## **SUPPLEMENTAL FIGURE LEGENDS**

### **Figure S1. Growth of WT and eIF5Ad strains used for ribosome profiling – Related to Figure 1**

(A) Western blot analysis of eIF5A depletion over time. Same number of cells were pelleted, lysed and subjected to western blotting using antibodies against eIF5A (Saini et al., 2009), mAID (MBL International Corporation) and PGK1 (Life Technologies-Novex). (B) Growth of WT and eIF5Ad cells on YPGR and YPDauxin plates. Plates are incubated at 30°C for 2 days. (C) Growth potential of WT and eIF5Ad strains after media change to YPD containing 0.5 mM auxin (0 hr time point) by monitoring growth at OD<sub>600</sub>. (D) Sucrose gradient sedimentation analysis of cell lysates from WT and eIF5Ad cells. Cells were grown and harvested under the condition in (C), lysed in footprint lysis buffer and subjected to centrifugation through 10-50% sucrose gradients. Polysome profiles were collected by monitoring at 254 nm. P/M denotes polysome/monosome ratio. (E) Scatter plots showing reproducibility of ribosome footprints on coding sequences between biological replicates for WT (left) and eIF5Ad (right). Pearson correlations are shown in each comparison.

### **Figure S2. Disproportionate distribution of ribosome occupancy in eIF5Ad cells – Related to Figure 1 and 7**

(A) Polarity scores of ribosome occupancy on 4,946 genes from Figure 1C are plotted for WT and eIF5Ad cells. Genes in lower left quadrant correspond to those with disproportionate distribution of ribosome occupancy toward their 5'-ends. (B)

In comparison with Figure 1D, distributions of polarity scores for genes containing Pro-Pro dipeptide motifs and genes lacking these motifs from WT cells. (C) Polarity scores of 2,186 genes are plotted for wt and  $\Delta efp$  *E. coli* strains (Woolstenhulme et al., 2015). Genes with strongest Pro-containing stalling motifs before the halfway point are shown in pink.

**Figure S3. Metacodon analysis of ribosome stalling in eIF5Ad cells - Related to Figure 2 and 7**

(A) Average ribosome occupancy centered at 9,082 pause sites that match the 29 pausing motifs identified in eIF5Ad cells (Figure 2D). Arrow indicates stacked ribosomes. (B) Similar to (A), average plot centered at 1,350 pause sites that match the 4 non-Pro tripeptide motifs (RDK, DVG, DDG, GGT). (C) Analysis of codon optimality effects in eIF5Ad strain. Ribosome occupancy in the E, P and A sites under eIF5A depletion relative to WT. 61 sense codons are colored according to their stAI values (Sabi and Tuller, 2014). (D) Average ribosome density plot centered at the CTCCCG inhibitory codon pair (Gamble et al., 2016).

**Figure S4. eIF5A purification and modification, stimulation of Met-Puromycin formation, and analysis of *in vitro* peptidyl-tRNA dropoff - Related to Figures 3 and 4**

(A) Coomassie blue stained gel of purified eIF5A proteins. (B) MALDI-TOF analysis of purified eIF5A proteins to confirm hypusine modification. (C) Electrophoretic TLC analysis of *in vitro* Met-Puromycin assay. Time points of Met-Puro formation

were quantified and reaction progression fitted to a single exponential to calculate the observed rate. (D) Electrophoretic TLC analysis of dropoff products in elongation reactions as observed by addition of peptidyl-tRNA hydrolase (PTH).

**Figure S5. Effect of C-terminal amino acid and +4 nucleotide on eIF5A-stimulated termination - Related to Figure 5**

(A) Violin plot of pause scores at stop codons in WT and eIF5Ad cells sorted by C-terminal amino acid. Fold change indicates the average pause score ratio of eIF5Ad/WT. (B) Similar to (A), but sorted by the nucleotide following the stop codon.

**Figure S6. eIF5A is a potent stimulator of peptide release activity, is heat-insensitive, and is a common contaminant of protein purifications - Related to Figure 6**

(A) Electrophoretic TLC analysis of eRF1:eRF3 peptide release kinetics in the presence of various amounts of hypusinated eIF5A, hypusinated eIF5A that was boiled at 95°C for 15 min prior to addition, unmodified eIF5A, and a purified His<sub>6</sub>-MBP construct expressed in *S. cerevisiae* containing low-level (though highly active) eIF5A contamination (see protein purification methods for more discussion). (B) Observed rates of peptide hydrolysis calculated for samples presented in (A).

**Figure S7. eIF5A stimulates peptide release on pelleted elongation complexes, non-pelleted complexes, and functions through canonical eRF1-GGQ mechanism - Related to Figure 6**

(A) Electrophoretic TLC analysis of eRF1:eRF3 peptide release kinetics in the presence of hypusinated eIF5A using pelleted MFK complexes containing UAA stop codon in A site. (B) Same as (A) except using elongation complexes that were not pelleted, containing MFFK peptide and UAA stop codon in A site. TLCs were cropped to include similar time points for comparison. (C) Analysis of eIF5A stimulation of peptide release kinetics in presence of wild-type eRF1 and an eRF1 GGQ→AGQ mutant that is defective for peptidyl hydrolysis.

**Table S1. Pausing at tripeptide motifs in WT and eIF5Ad cells - Related to Figure 2 and 7**

Pause scores of 6,022 tripeptide motifs are computed for WT and eIF5Ad cells, and ranked by the pause scores in eIF5Ad cells. Motifs with less than 100 occurrences in yeast transcriptome were excluded. Ratio denotes pause score ratio of eIF5Ad/WT. Counts are the numbers of motifs included for average.

**Table S2. Pause scores for dipeptide motifs in WT and eIF5Ad cells - Related to Figure 3**

Pause scores of 396 dipeptide motifs, ranked by the pause scores in eIF5Ad cells. Motifs with less than 500 occurrences in yeast transcriptome were excluded.

**Table S3. Oligonucleotides used in this study**

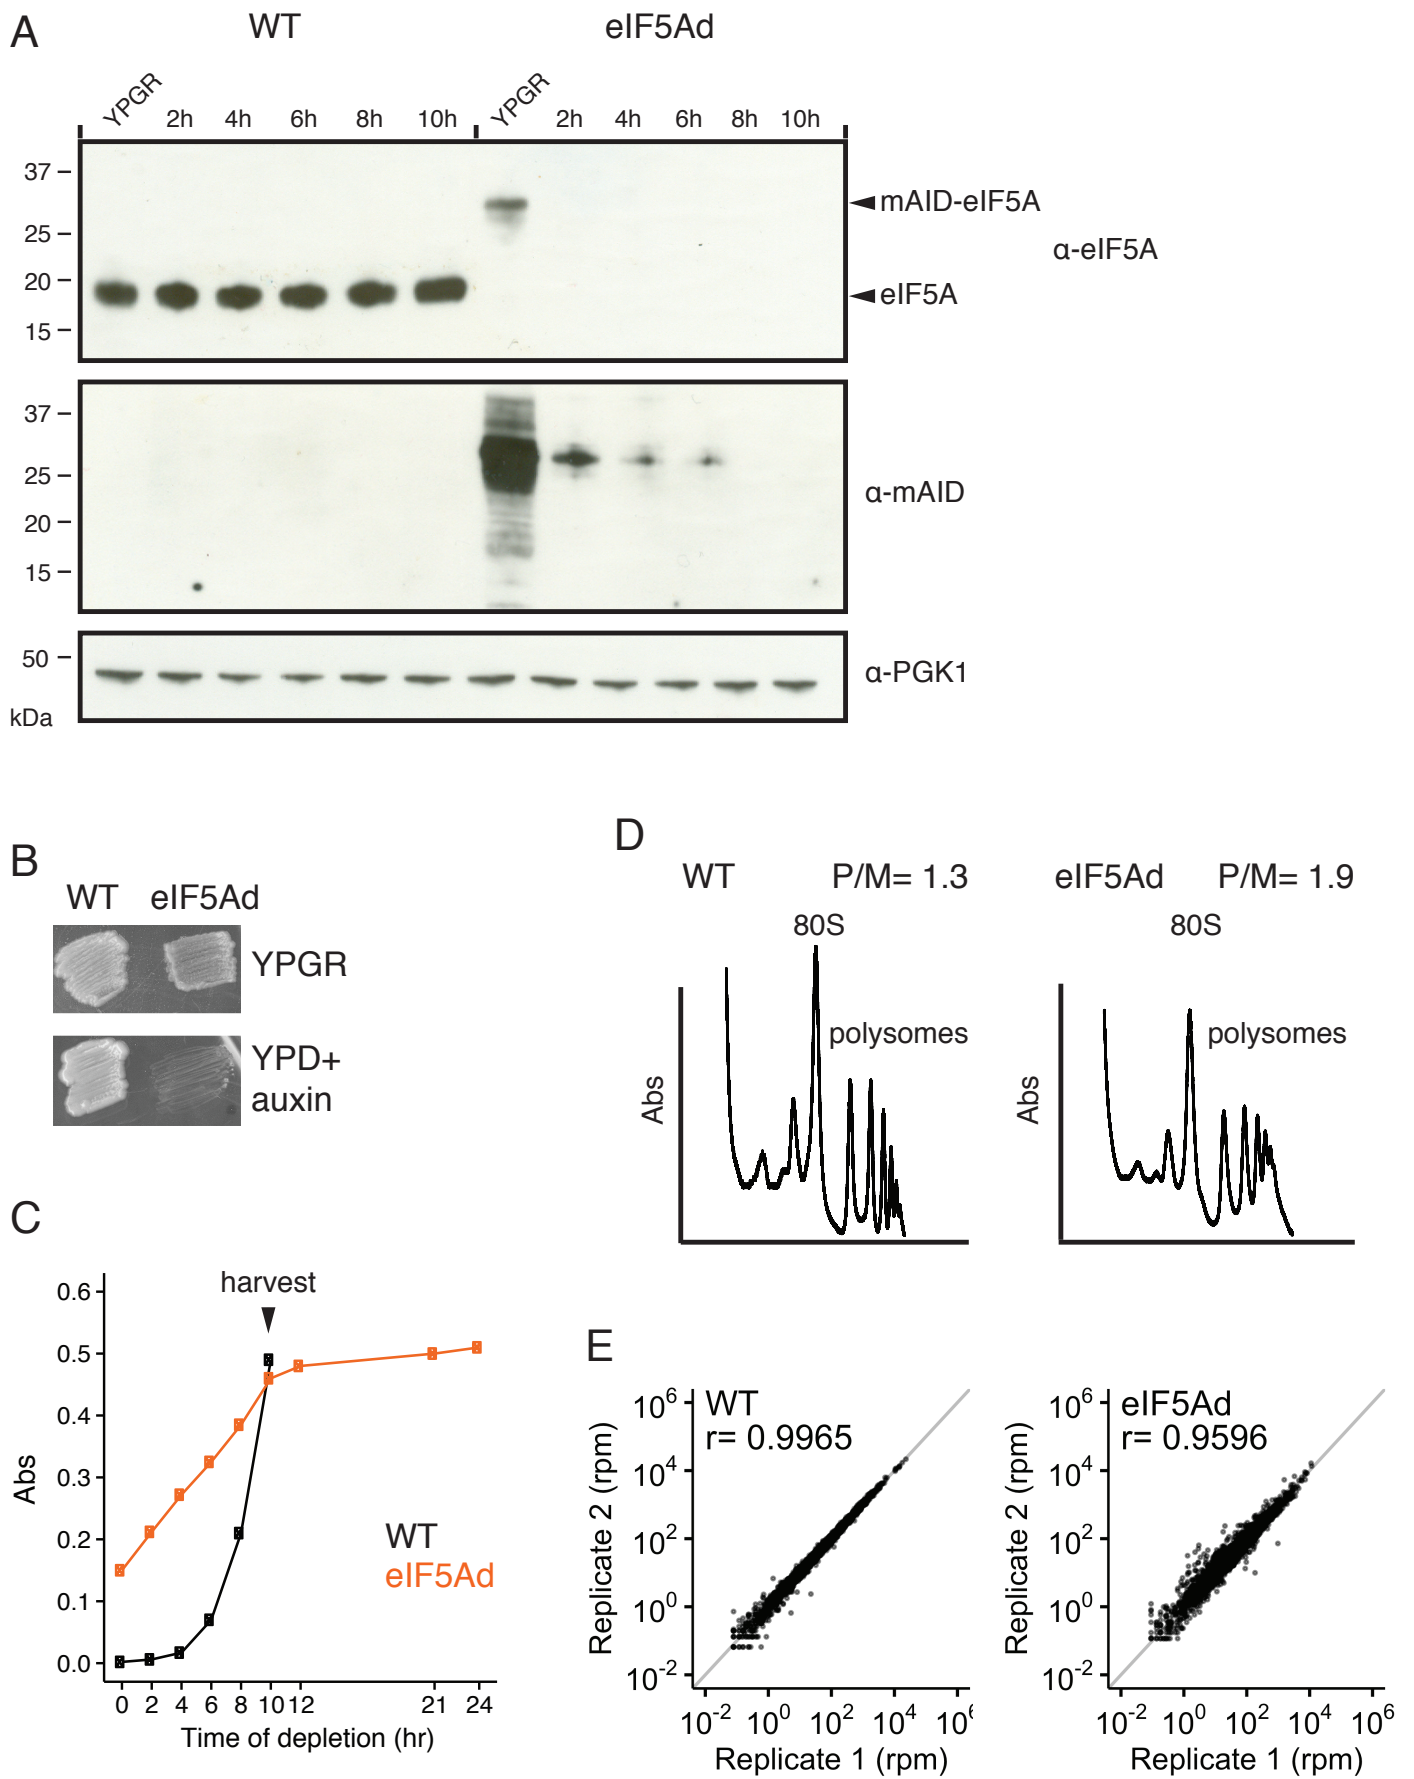

Figure S1

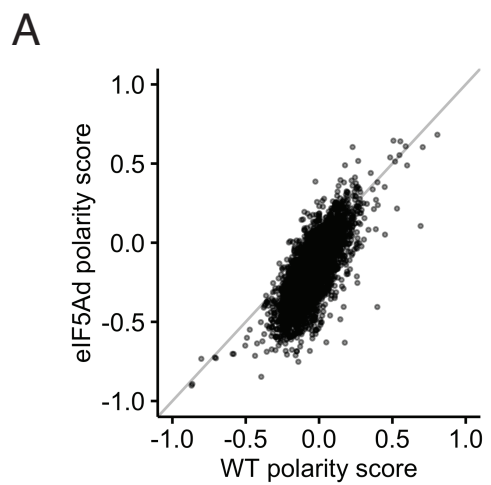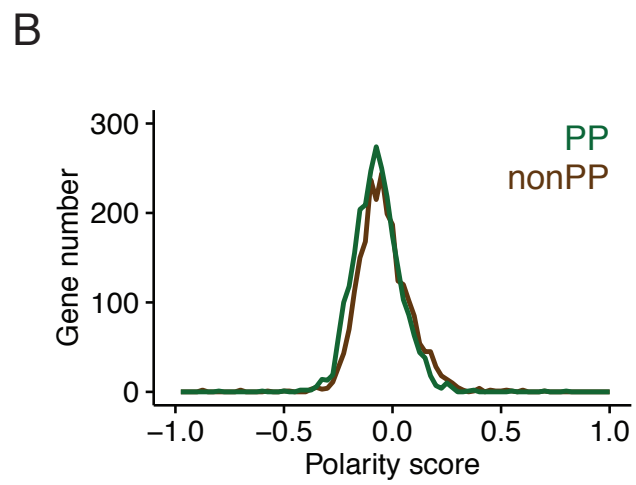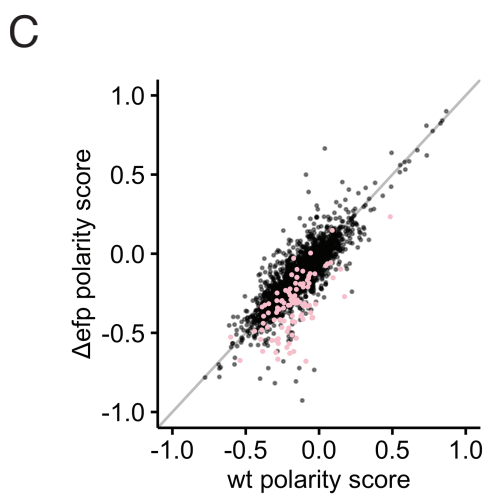

Figure S2

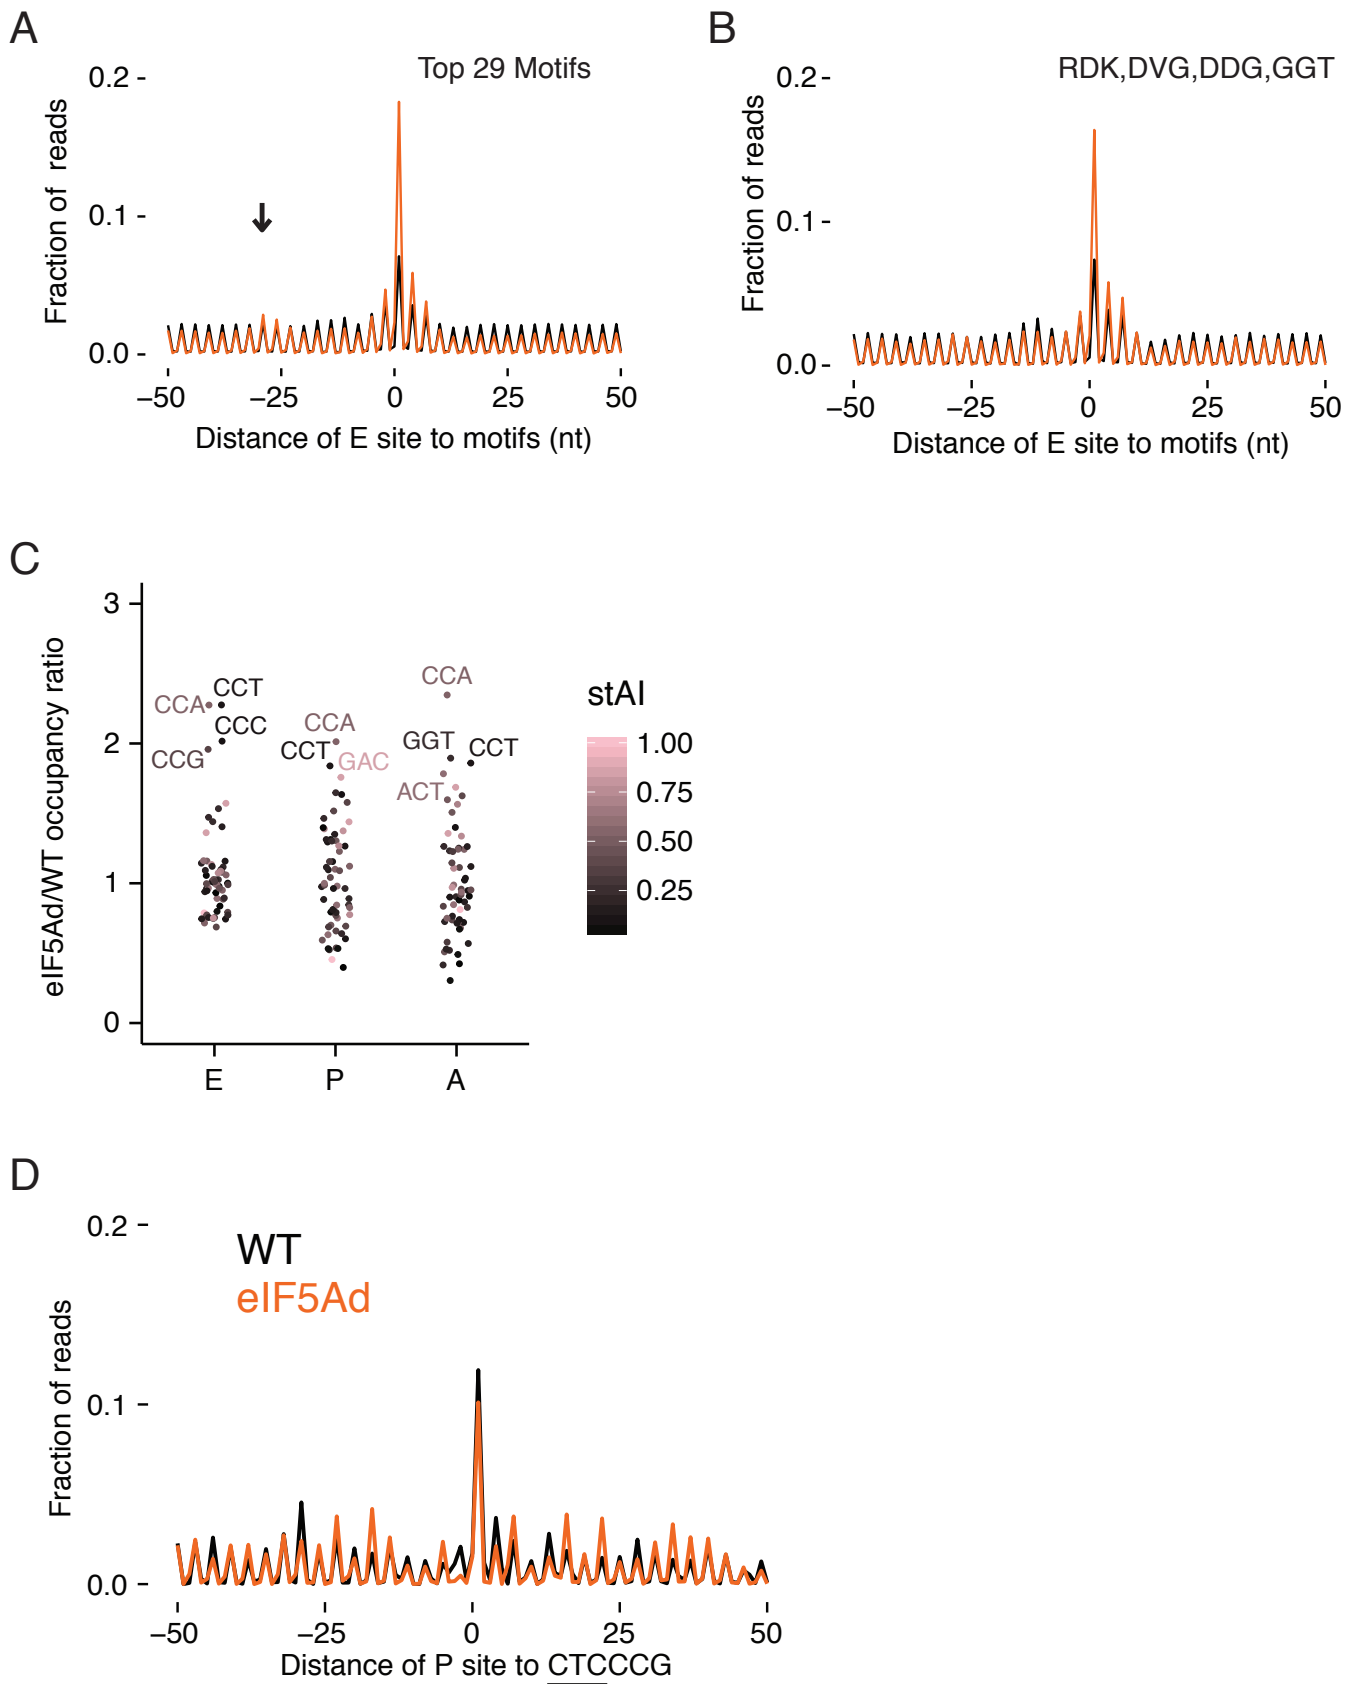

Figure S3

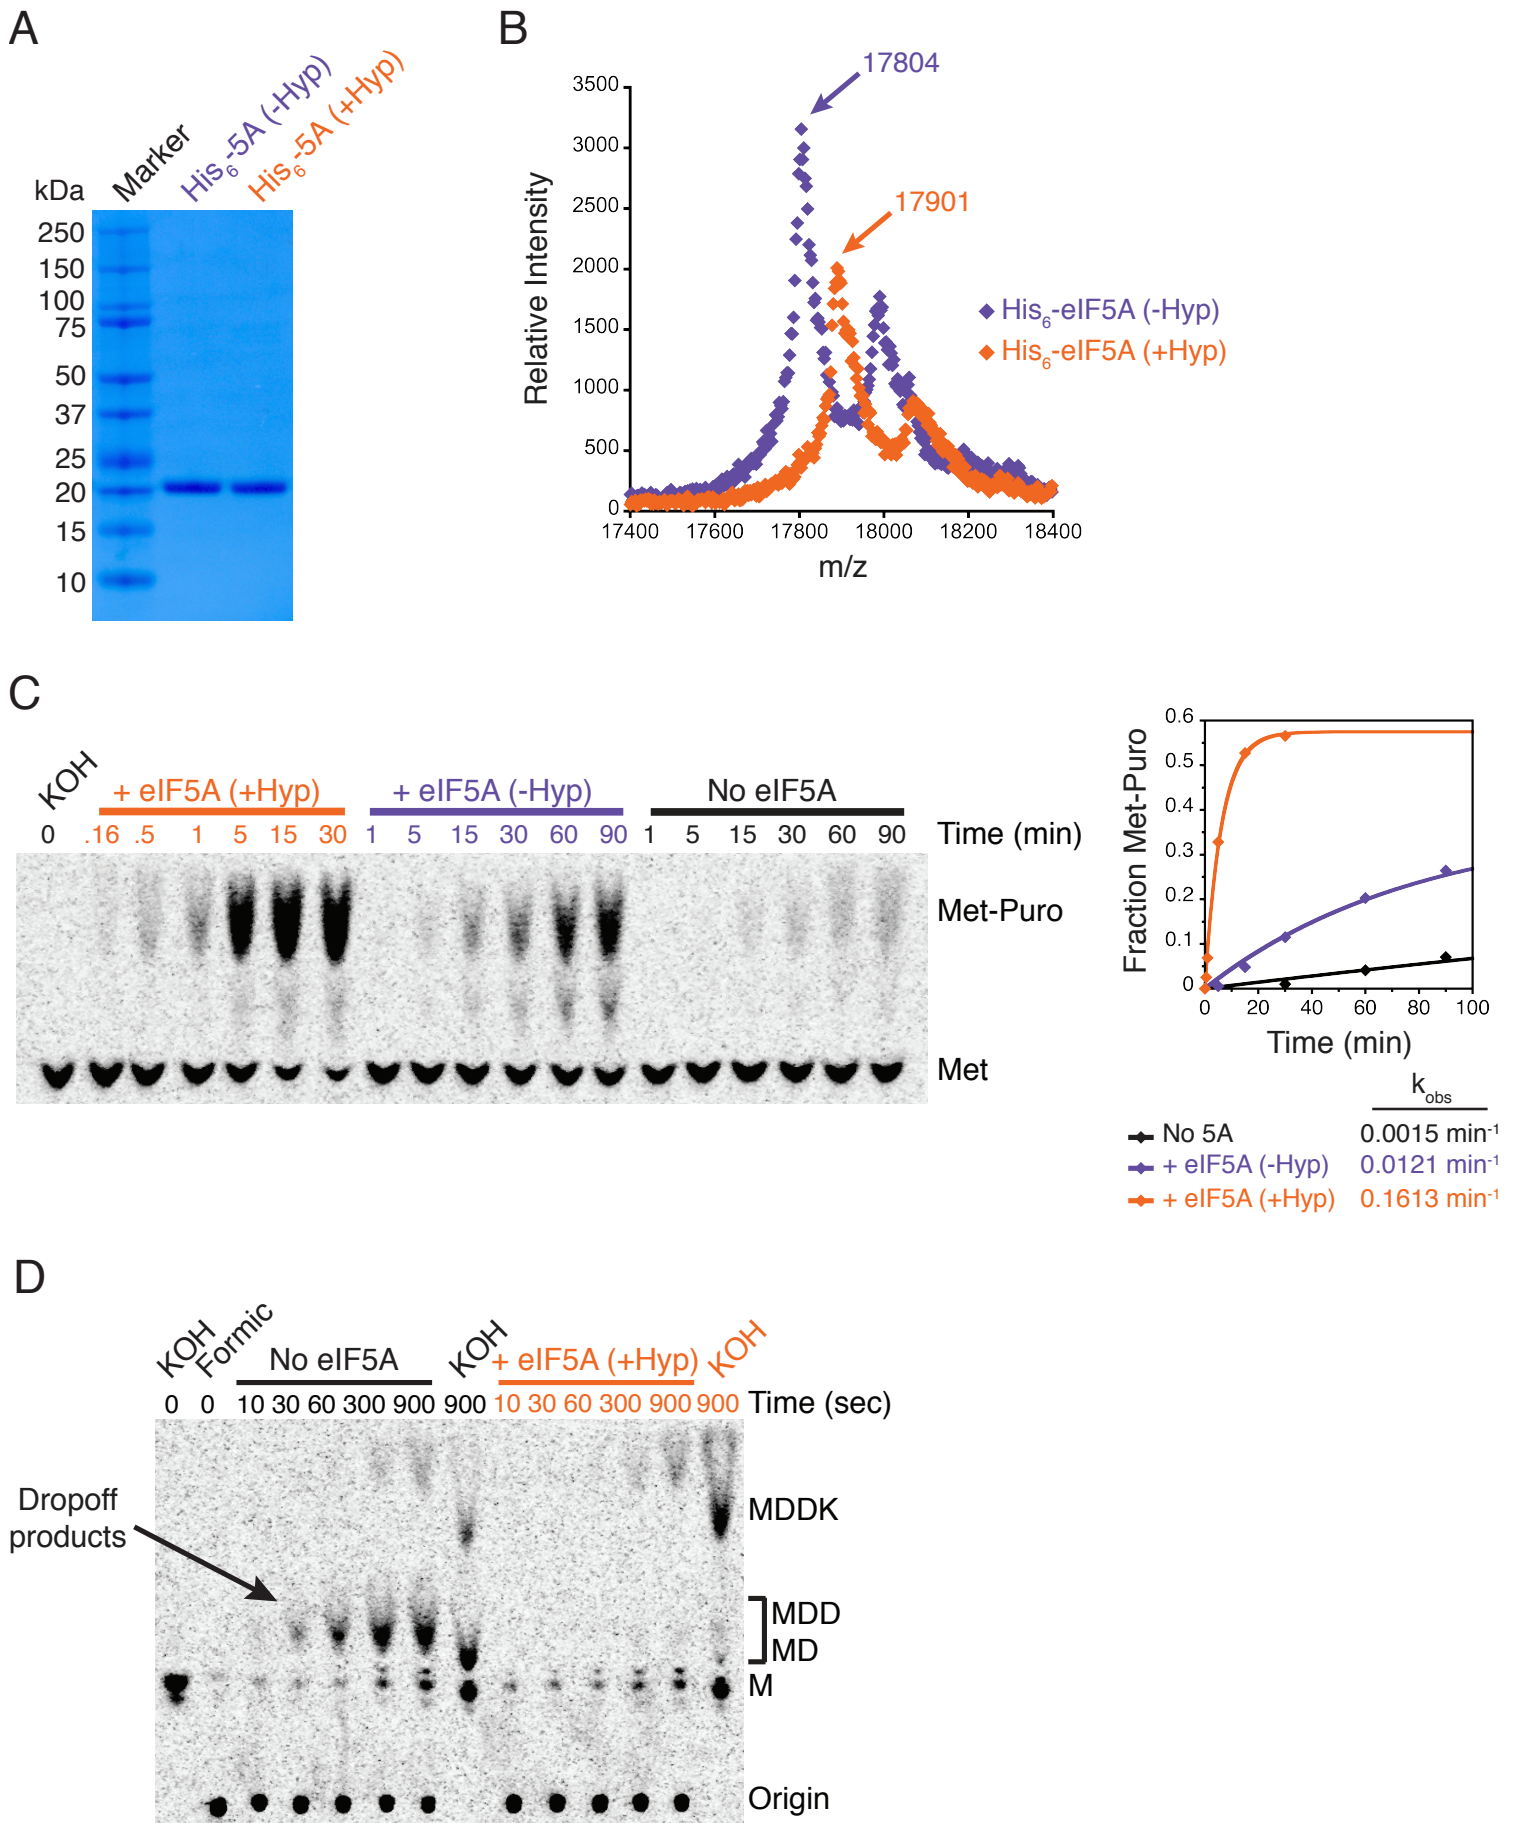

Figure S4



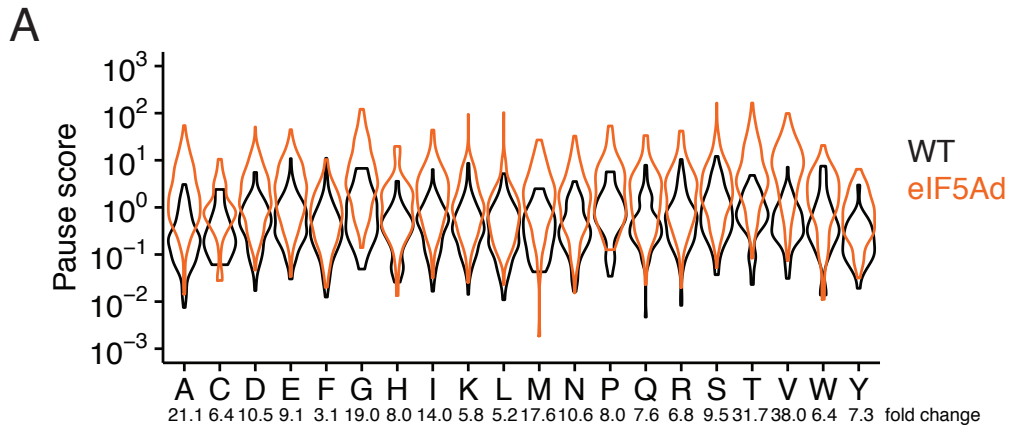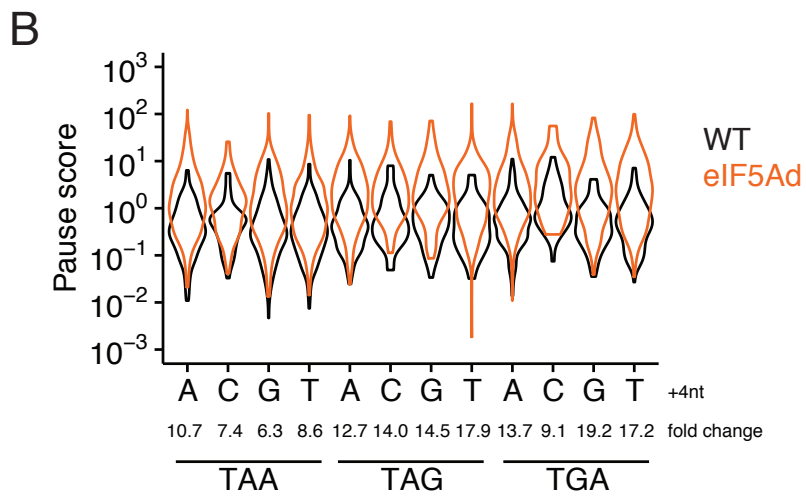

Figure S5

A

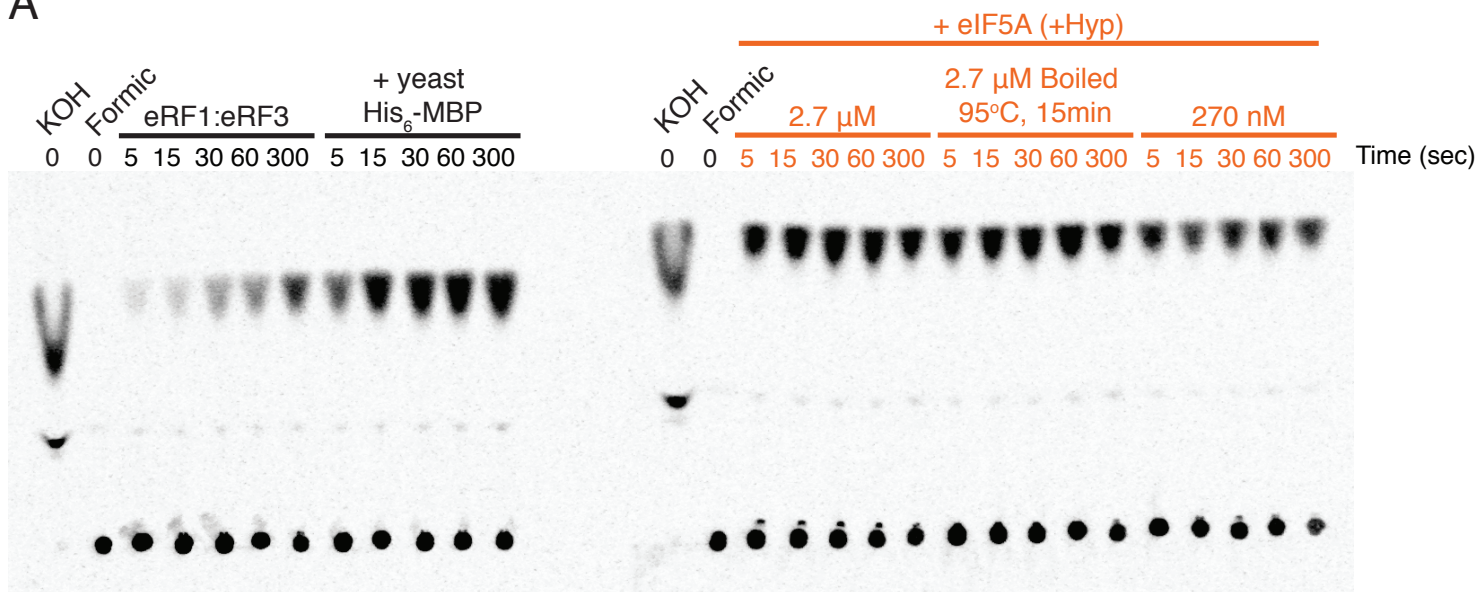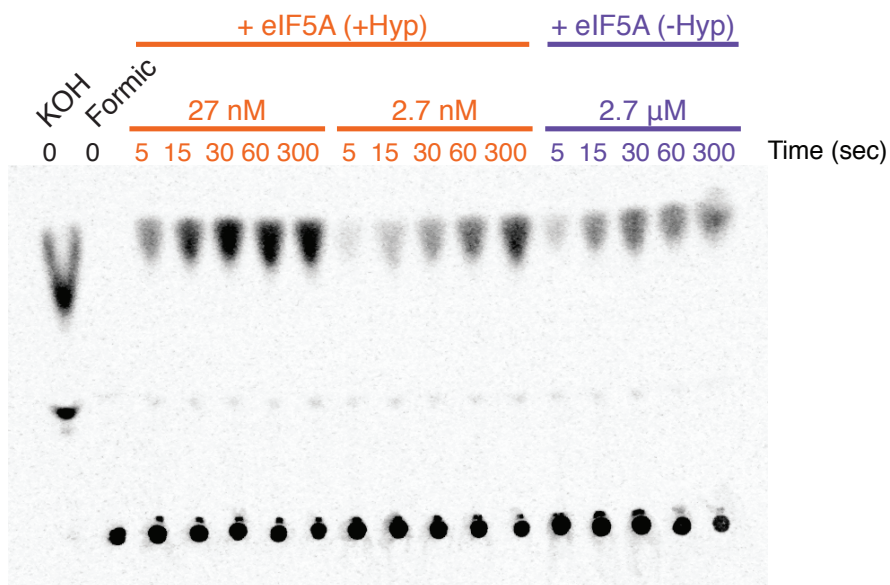

B

| Sample                        | $k_{\text{obs}}$ release (min <sup>-1</sup> ) |
|-------------------------------|-----------------------------------------------|
| eRF1:eRF3                     | 0.5                                           |
| + yeast His <sub>6</sub> -MBP | 7.8                                           |
| + 2.7 μM eIF5A (+Hyp)         | 17                                            |
| + 270 nM eIF5A (+Hyp)         | 15                                            |
| + 27 nM eIF5A (+Hyp)          | 3.8                                           |
| + 2.7 nM eIF5A (+Hyp)         | 0.7                                           |
| + 2.7 μM eIF5A (-Hyp)         | 1.6                                           |
| + 2.7 μM eIF5A (+Hyp) Boiled  | 13                                            |

Saturating eIF5A

Figure S6

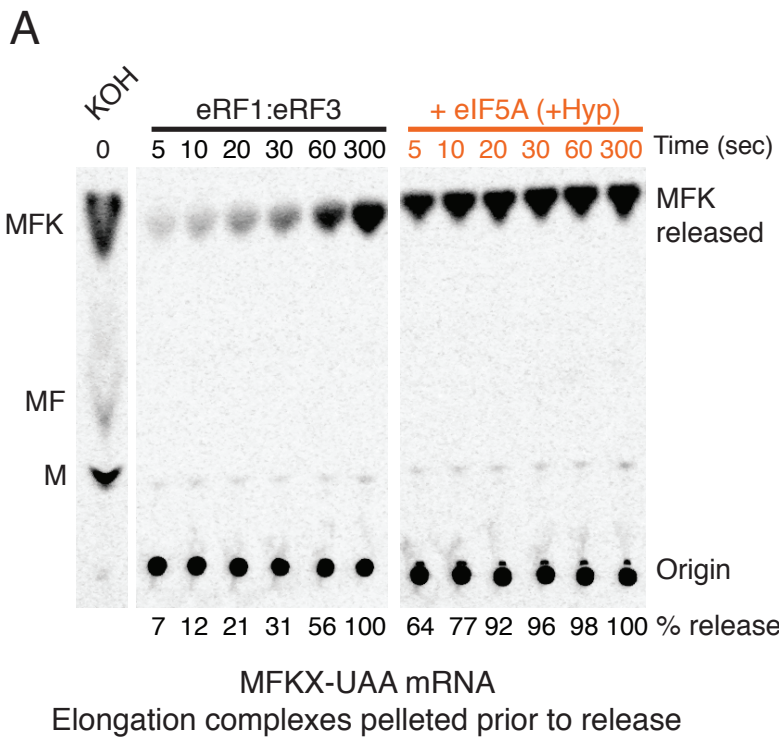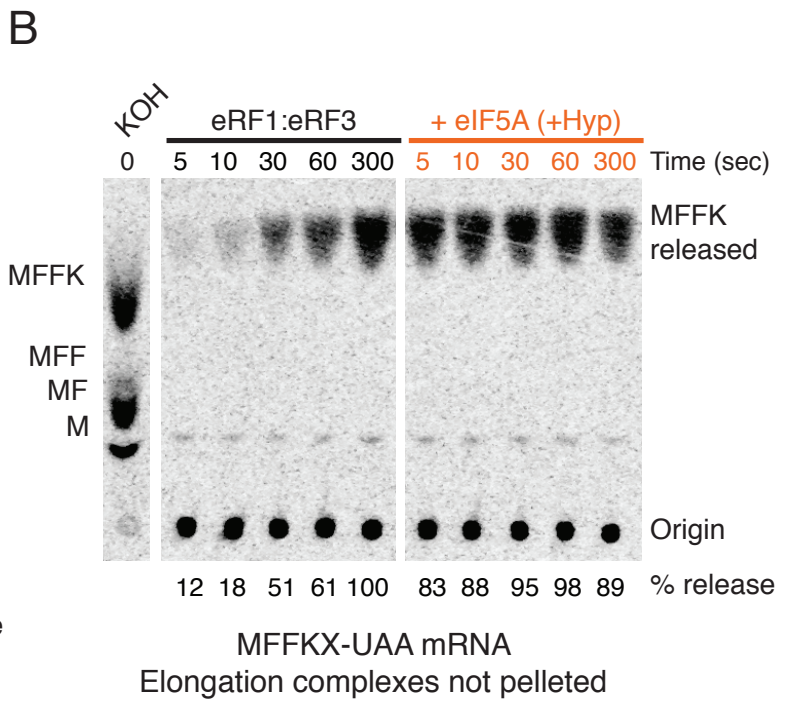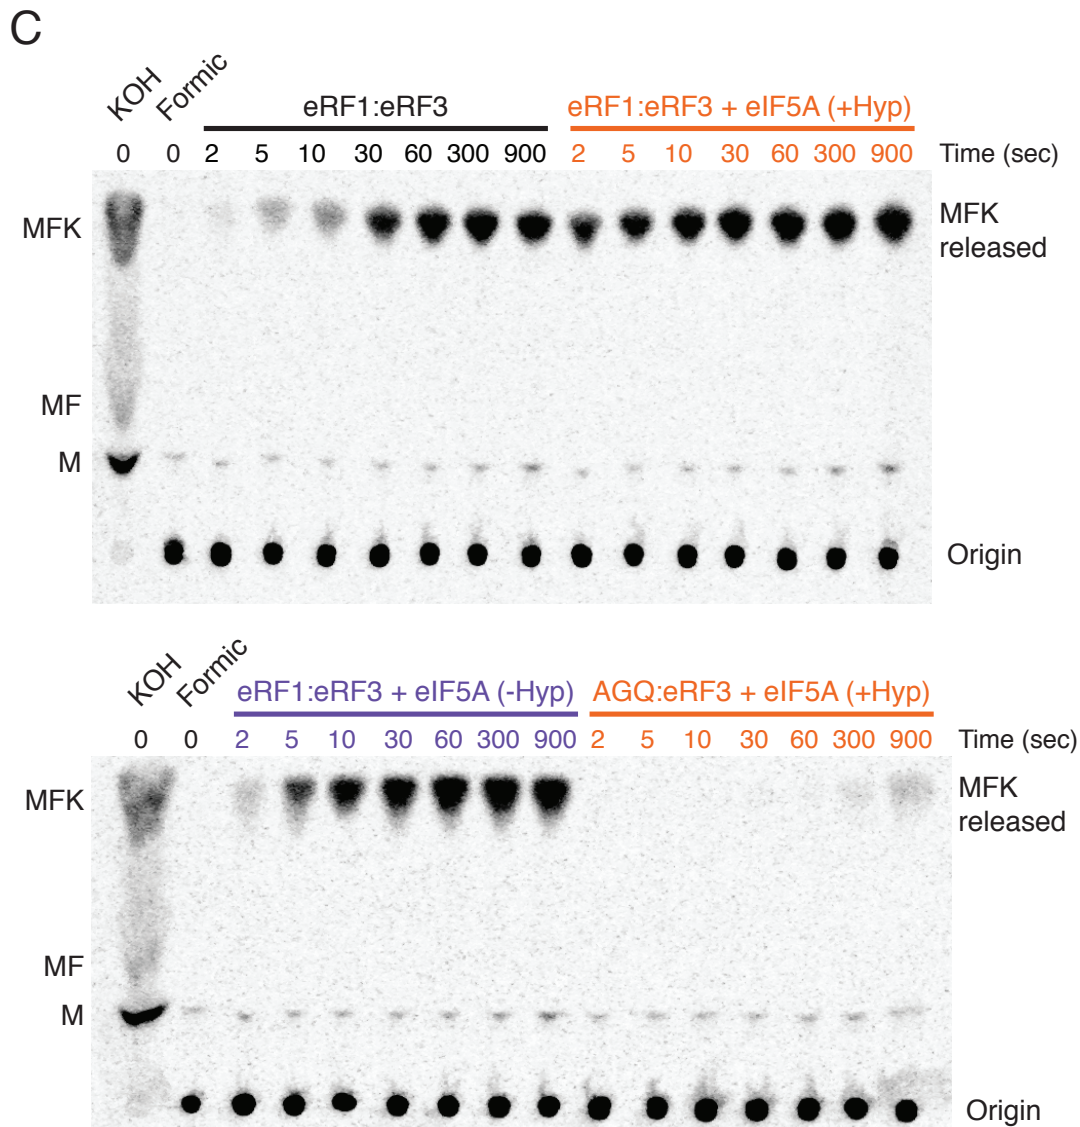

Figure S7
